# Supplementary material for: Self-Avoiding Random Walks as a Model to Study Athermal Linear Polymers under Extreme Plate Confinement
Source: MDPI journal article supplement (doi:10.3390/polym12040799), 2020-04-03
Supplement: s1 [file s1]

This area requires a 3D PDF enabled viewer such as Adobe Reader.
