# Supplementary material for: Self-Avoiding Random Walks as a Model to Study Athermal Linear Polymers under Extreme Plate Confinement
Source: Polymers (Basel). 2020 Apr 3;12(4):799. doi: 10.3390/polym12040799 (PMC7240602; doi:10.3390/polym12040799)
Supplement: Supplementary file 1 [file polymers-12-00799-s001.zip]

Archive with 11 entries (11 files):
- Figure03a_3D.pdf
- Figure03b_3D.pdf
- Figure03c_3D.pdf
- Figure03d_3D.pdf
- Figure04a_3D.pdf
- Figure04b_3D.pdf
- Figure04c_3D.pdf
- Figure04d_3D.pdf
- Figure04e_3D.pdf
- Figure04_animated_3D.pdf
- polymers-749786-final_interactive.pdf
